# Supplementary material
Source: HighWire-hosted journal article supplement (http://molpharm.aspetjournals.org/highwire/filestream/76818/field_highwire_adjunct_files/0/SUPPLEMENTAL_DATA_FIGURES.pdf)
Supplement: SUPPLEMENTAL_DATA_FIGURES.pdf [file SUPPLEMENTAL_DATA_FIGURES.pdf]

MOLECULAR PHARMACOLOGY:  $\mu$ - Opioid receptors: correlation of agonist efficacy for signalling with ability to activate internalization. Jamie McPherson, Guadalupe Rivero, Myma Baptist, Javier Llorente, Suleiman Al-Sabah, Cornelius Krasel, William L Dewey, Chris P Bailey, Elizabeth M Rosethorne, Steven J Charlton , Graeme Henderson, and Eamonn Kelly

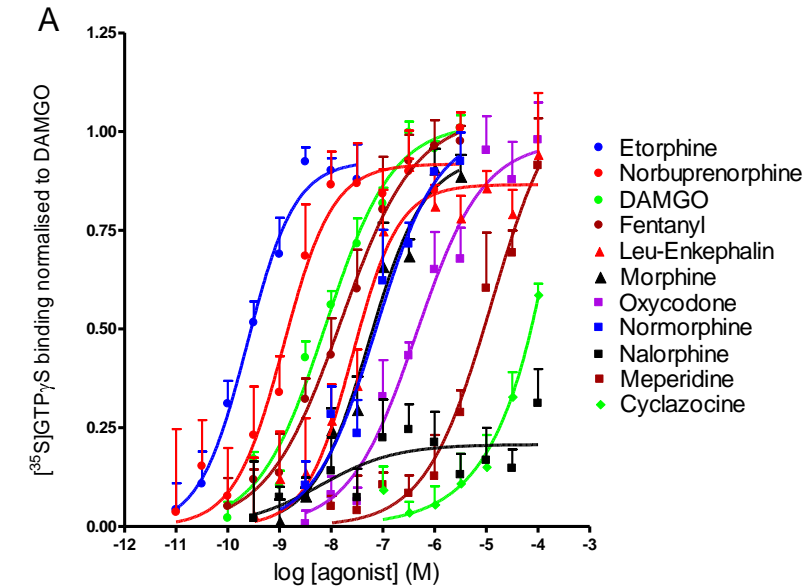

**Supplemental data Figure 1.** MOPr agonist concentration-effect curves for  $[^{35}\text{S}]\text{GTP}\gamma\text{S}$  binding to HEK293 cell membranes. The data is shown on two graphs (A and B) to aid clarity. Etorphine is shown on both graphs as a reference.

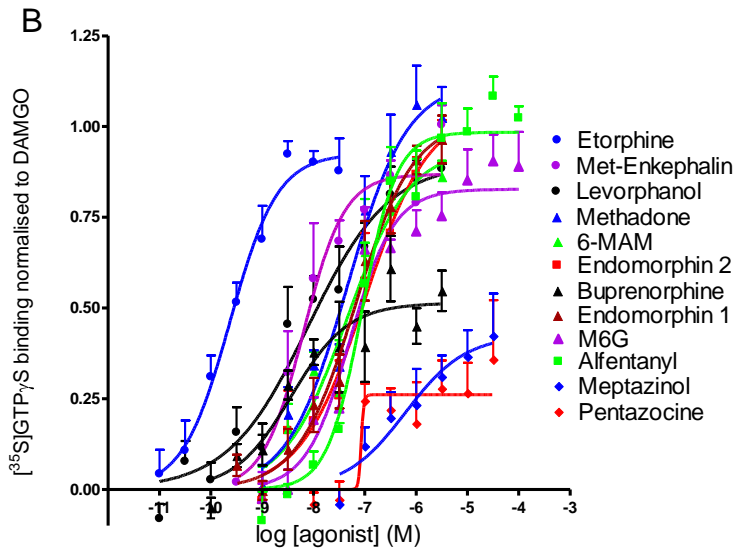

MOLECULAR PHARMACOLOGY:  $\mu$ - Opioid receptors: correlation of agonist efficacy for signalling with ability to activate internalization. Jamie McPherson, Guadalupe Rivero, Myma Baptist, Javier Llorente, Suleiman Al-Sabah, Cornelius Krasel, William L Dewey, Chris P Bailey, Elizabeth M Rosethorne, Steven J Charlton , Graeme Henderson, and Eamonn Kelly

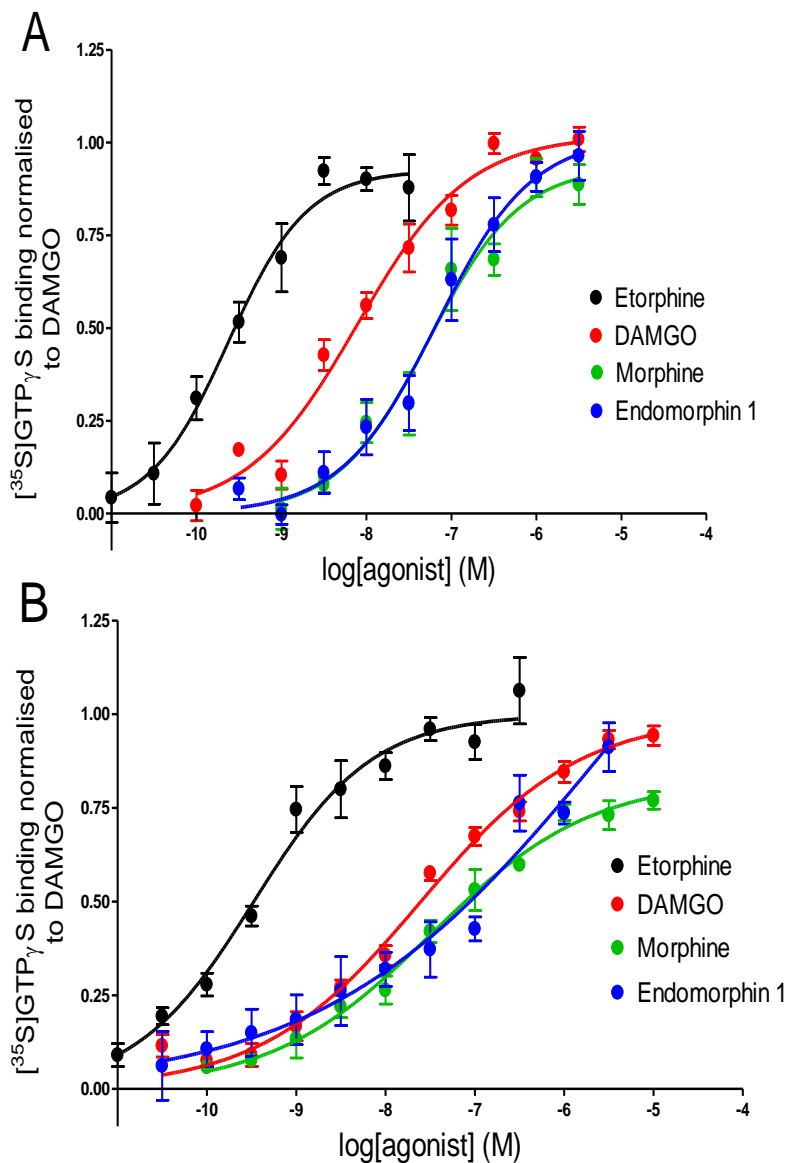

**Supplemental data Figure 2.** Agonist concentration-effect curves for  $[^{35}\text{S}]\text{GTP}_{\gamma}\text{S}$  binding to membranes from (A) HEK293 cells expressing T7-MOPr and (B) HEK293 cells expressing the PathHunter™ system. Data are shown as means  $\pm$  S.E.M. from at least 3 independent experiments.

MOLECULAR PHARMACOLOGY:  $\mu$ - Opioid receptors: correlation of agonist efficacy for signalling with ability to activate internalization. Jamie McPherson, Guadalupe Rivero, Myma Baptist, Javier Llorente, Suleiman Al-Sabah, Cornelius Krasel, William L Dewey, Chris P Bailey, Elizabeth M Rosethorne, Steven J Charlton, Graeme Henderson, and Eamonn Kelly

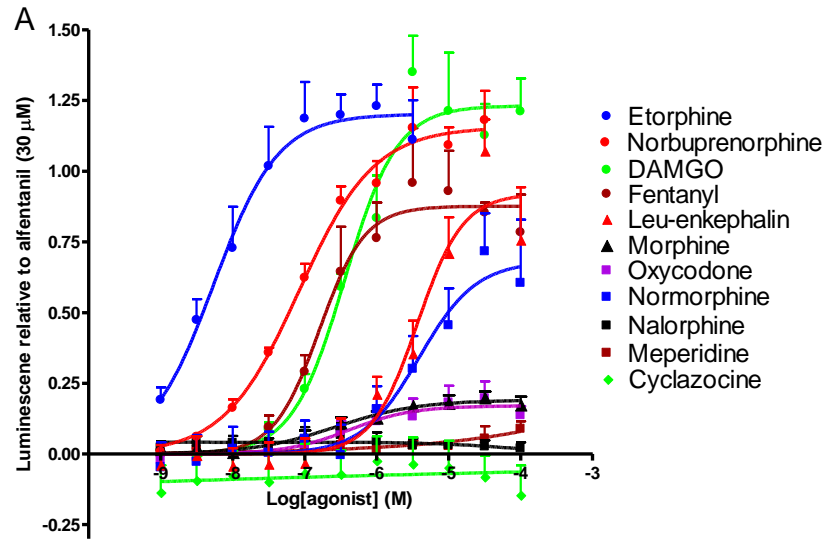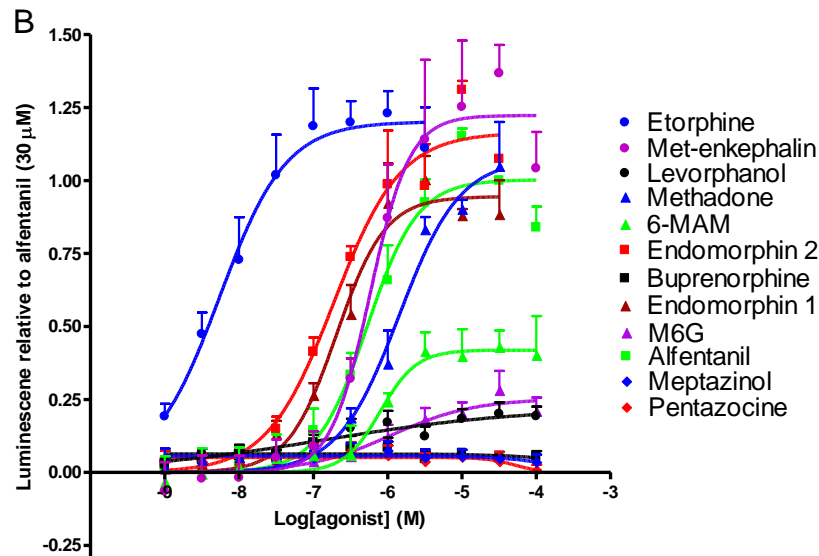

**Supplemental data Figure 3.** MOPr agonist concentration-effect curves for arrestin-3 recruitment in HEK293 cells using the PathHunter™ assay. The data is shown on two graphs (A and B) to aid clarity. Etorphine is shown on both graphs as a reference. The colour scheme for agonists is the same as supplemental data Figure 1.

MOLECULAR PHARMACOLOGY:  $\mu$ - Opioid receptors: correlation of agonist efficacy for signalling with ability to activate internalization. Jamie McPherson, Guadalupe Rivero, Myma Baptist, Javier Llorente, Suleiman Al-Sabah, Cornelius Krasel, William L Dewey, Chris P Bailey, Elizabeth M Rosethorne, Steven J Charlton , Graeme Henderson, and Eamonn Kelly

### DAMGO 10 $\mu$ M

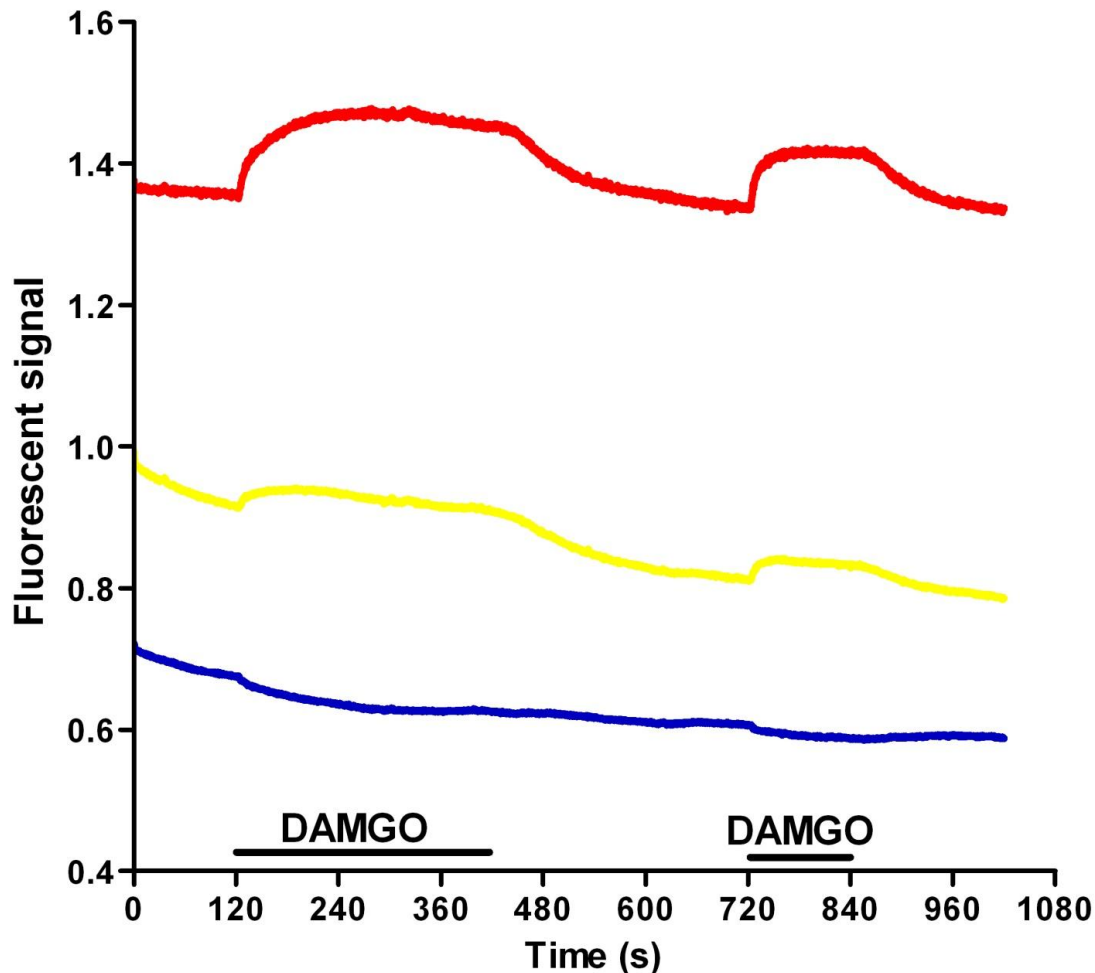

### Supplemental data Figure 4.

Example of the interaction between MOPr and arrestin-3 as measured by FRET. HEK293 cells were transiently transfected with rat MOPr-YFP, GRK2 and Arrestin-3-CFP. An increase in the FRET ratio (measured as  $F_{535}/F_{480}$  and represented with a red line) is characterised by an increase in the  $F_{535}$  (yellow fluorescence from the MOPr-YFP) and a simultaneous decrease in the  $F_{480}$  (cyan fluorescence from the Arrestin-3-CFP) and reflects the interaction between MOPr-YFP and Arrestin-3-CFP. Traces were filtered off-line with Axoscope 9.2.

MOLECULAR PHARMACOLOGY:  $\mu$ - Opioid receptors: correlation of agonist efficacy for signalling with ability to activate internalization. Jamie McPherson, Guadalupe Rivero, Myma Baptist, Javier Llorente, Suleiman Al-Sabah, Cornelius Krasel, William L Dewey, Chris P Bailey, Elizabeth M Rosethorne, Steven J Charlton, Graeme Henderson, and Eamonn Kelly

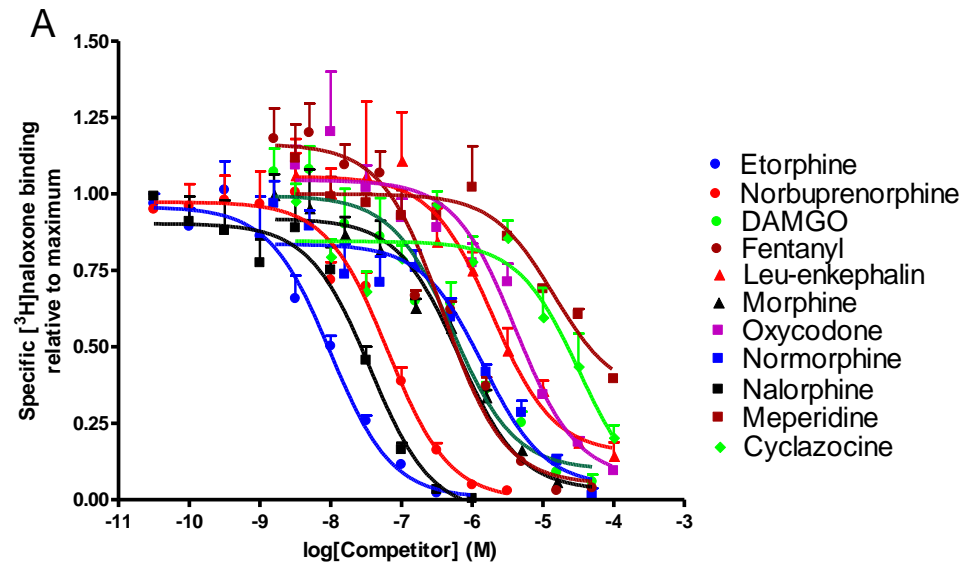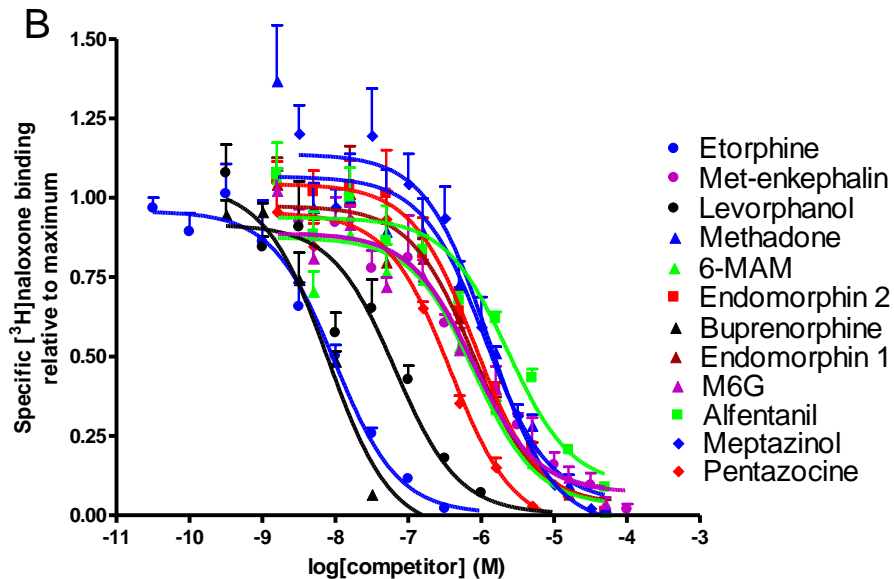

**Supplemental data Figure 5.** MOPr agonist competition curves for displacement of  $[^3\text{H}]$ naloxone from HEK293 cell membranes. The data is shown on two graphs (A and B) to aid clarity. Etorphine is shown on both graphs as a reference. The colour scheme for agonists is the same as supplemental data Figures 1 and 3.

MOLECULAR PHARMACOLOGY:  $\mu$ - Opioid receptors: correlation of agonist efficacy for signalling with ability to activate internalization. Jamie McPherson, Guadalupe Rivero, Myma Baptist, Javier Llorente, Suleiman Al-Sabah, Cornelius Krasel, William L Dewey, Chris P Bailey, Elizabeth M Rosethorne, Steven J Charlton , Graeme Henderson, and Eamonn Kelly

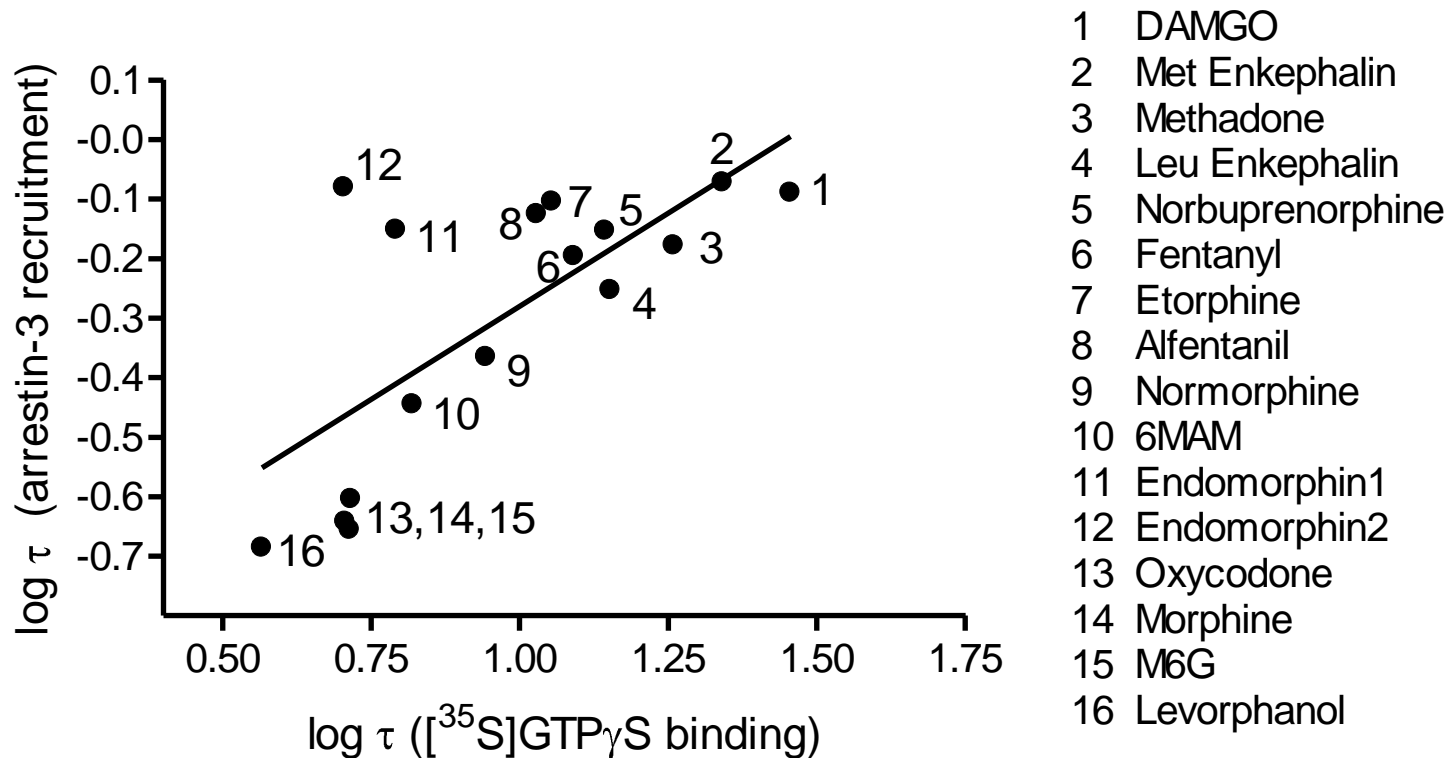

**Supplemental data Figure 6.** Correlation of log  $\tau$  values for [<sup>35</sup>S]GTP $\gamma$ S binding and arrestin-3 recruitment. Included on the plot are the 16 agonists where it was possible to determine  $\tau$  values for both functional outputs. The  $r^2$  for the correlation is 0.511,  $P < 0.05$ . Agonists not included are buprenorphine, pentazocine, meptazinol, meperidine, cyclazocine and nalorphine.
